# Supplementary material for: AKAP150 Palmitoylation Regulates Synaptic Incorporation of Ca2+-Permeable AMPA Receptors to Control LTP
Source: PubMed Central journal article supplement — Cell Rep. Author manuscript; Available in PMC 2018 Nov 29. (PMC6263960; doi:10.1016/j.celrep.2018.09.085), 2018-10-23
Supplement: NIHMS1511536-supplement-1.pdf [file NIHMS1511536-supplement-1.pdf]

**Cell Reports, Volume 25**

**Supplemental Information**

**AKAP150 Palmitoylation Regulates**

**Synaptic Incorporation of Ca<sup>2+</sup>-Permeable**

**AMPA Receptors to Control LTP**

**Alicia M. Purkey, Kevin M. Woolfrey, Kevin C. Crosby, Dominik G. Stich, Wallace S. Chick, Jason Aoto, and Mark L. Dell'Acqua**

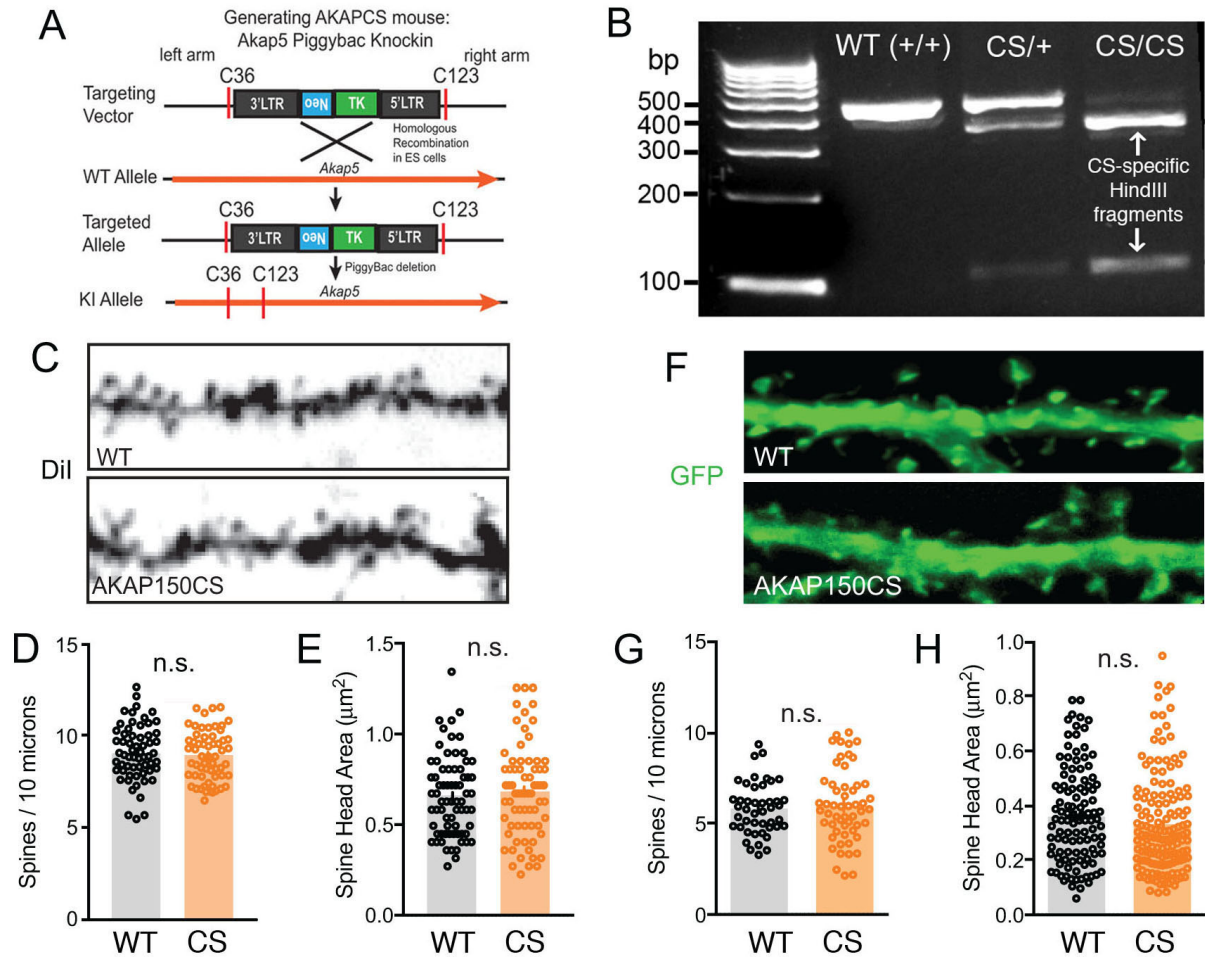

**Supplemental Figure 1 Related to Figures 1 and 2: Additional characterization of AKAPCS mice and cultured neurons.** (A) Generation of AKAPCS mice using the PiggyBac method, introducing two point mutations and a *HindIII* site. (B) Genotyping by PCR and restriction digestion of AKAP150WT and AKAP150CS heterozygous and homozygotes; *HindIII* digestion results in AKAP150CS specific fragments. (C) Dendritic segments from neurons in region CA1 of the hippocampus from WT or AKAPCS Dil stained slices, showing no significant difference in (D) spine number or (E) spine head area. (F) DIV14-16 hippocampal cultures transfected with GFP, show no significant difference in (G) spine number or (H) spine head area.

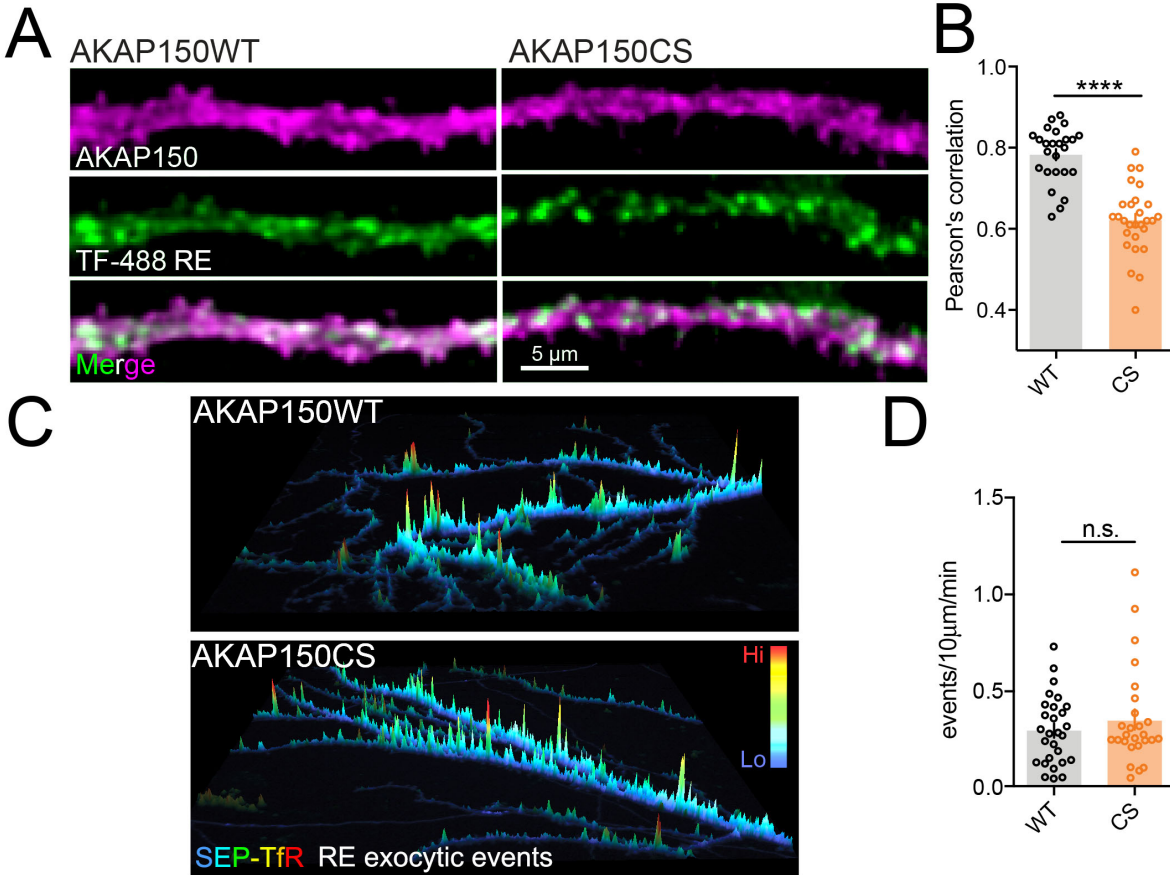

**Supplementary Figure 2 Related to Figures 1 and 2: AKAP150CS endosome localization and RE exocytosis.** (A) Maximum projection images of confocal z-stacks for DIV14 WT or AKAP150CS mouse neurons immunostained to visualize AKAP150 and labeled with Alexa488-transferrin (TF-488) to mark REs. (B) AKAPCS neurons show a significant decrease in AKAP co-localization with TF-488 (Pearson's Correlation WT  $0.78 \pm 0.02$ ,  $n=25$  cells; CS  $0.62 \pm 0.02$ ,  $n=28$  cells, \*\*\*\* $p < 0.0001$  by t-test) (C) Time composite (5 min, 0.2 Hz) images of DIV15-17 hippocampal neurons from WT or AKAPCS mice showing RE exocytic events in dendrites imaged with SEP-TfR (integrated intensity plotted on the z-axis in pseudocolor: blue, low to red, high). (D) No significant difference between genotypes was detected in the number of exocytic events (defined as 2.5-fold the median intensity and calculated as events/10  $\mu$ m/min).

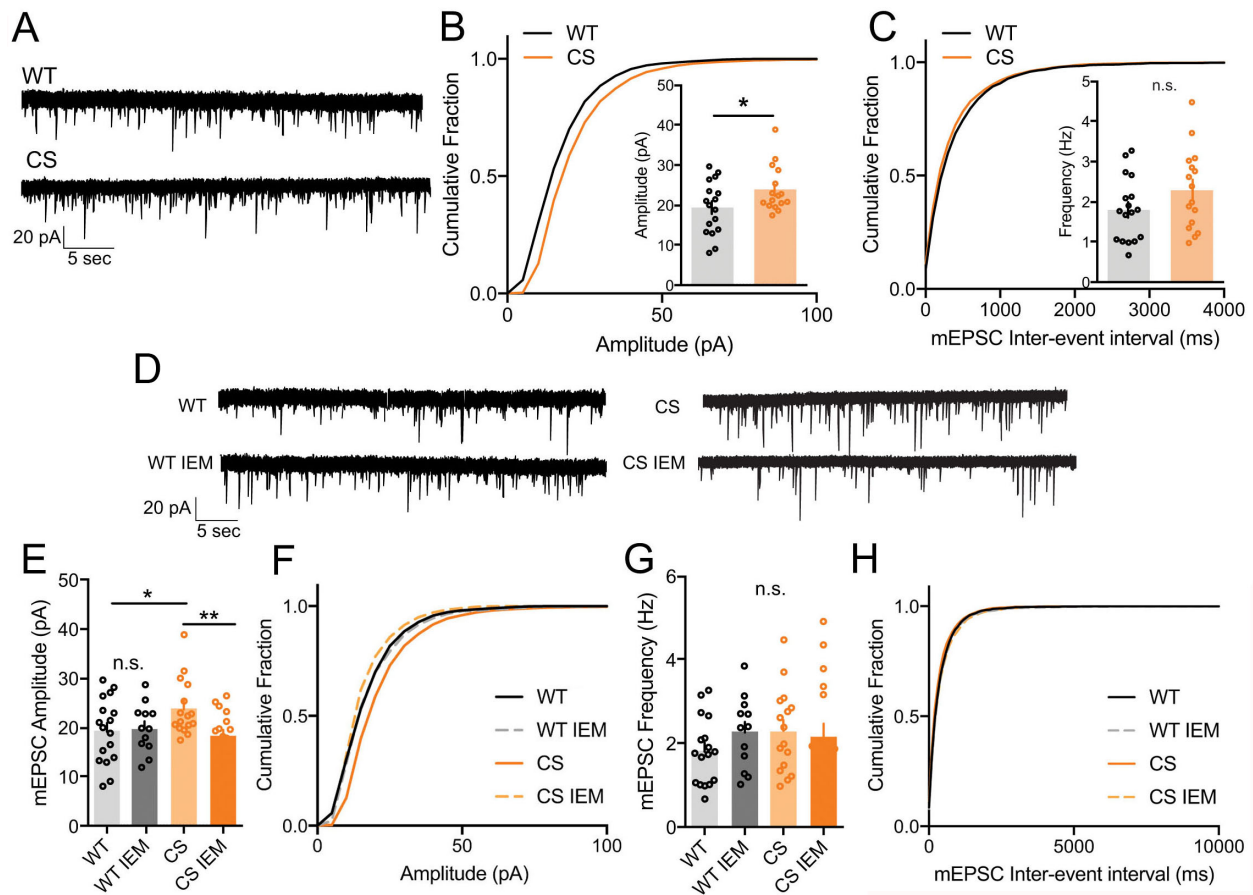

**Supplemental Figure 3 Related to Figure 3 and 4: Electrophysiological characterization of AKAPCS cultures.** (A-C) Whole-cell recordings from DIV13-14 hippocampal neuron cultures from WT and CS mice. AKAPCS cultures show an enhancement in (B) mEPSC amplitude (WT=19.34 ± 1.599 n=17 cells, CS=23.86 ± 1.434 n=16, unpaired t-test p=0.0443) and no change in (C) mEPSC frequency. (D-H) AKAPCS neuron cultures also exhibit enhancement in CP-AMPA sensitivity, showing a significant decrease in mEPSC amplitude with IEM blockade of CP-AMPA receptors (CS=23.86 ± 1.434 pA n=16 cells, CS IEM=18.42 ± 1.107 pA n=17 cells, unpaired t-test p=0.0050). \*p<0.05, \*\*p<0.01; unpaired t-test.

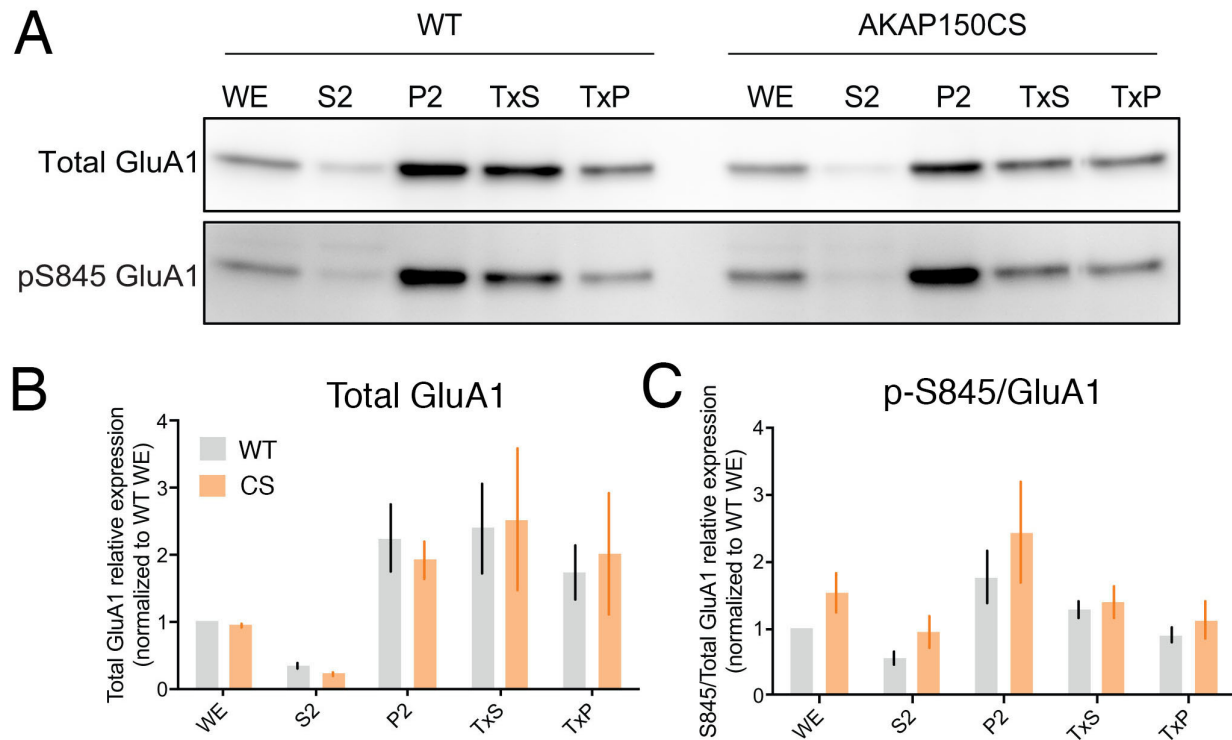

**Supplemental Figure 4 Related to Figures 1 and 4: Analysis of GluA1 Ser845 phosphorylation.** (A) Blots from fractionation of WT and CS hippocampal lysates probed for pS845 GluA1 and GluA1 and (B,C) quantification of these blots (n=3 animals) showing no significant difference in total GluA1 protein or S845 phosphorylation although trends toward increased S845 phosphorylation are seen for CS across all fractions.
